# Supplementary material
Source: PubMed Central journal article supplement (PMC4380180)
Supplement: NIHMS673031-supplement-Sup_Figure_legend.pdf [file NIHMS673031-supplement-Sup_Figure_legend.pdf]

**Supplemental Figure 1. Rapamycin does not increase activation of Akt in nonsusceptible MB cells.** D384 (A), NIH3T3 (B) cells were pretreated with rapamycin (20 nM) for 1 hour, and then the cells were infected with vMyxgfp (5 MOI). Levels of phospho-p70S6K and phospho-Akt (at Ser473 and Thr308) in cell lysates were determined by Western blot. The results shown that rapamycin or MV alone or in combination did not increase phosphorylation of Akt at either Ser473 or Thr308 in D384 cells (A), and only a small increase in phosphorylation of Akt at Thr308 was seen when MV and rapamycin were used in combination in NIH3T3 cells, but not at Ser473 which is required for full activation (B). Total Akt and mTOR levels were not changed.
