# Supplementary material
Source: PubMed Central journal article supplement (PMC4380180)

## Supplemental Figure 1

### A) D384 cell line

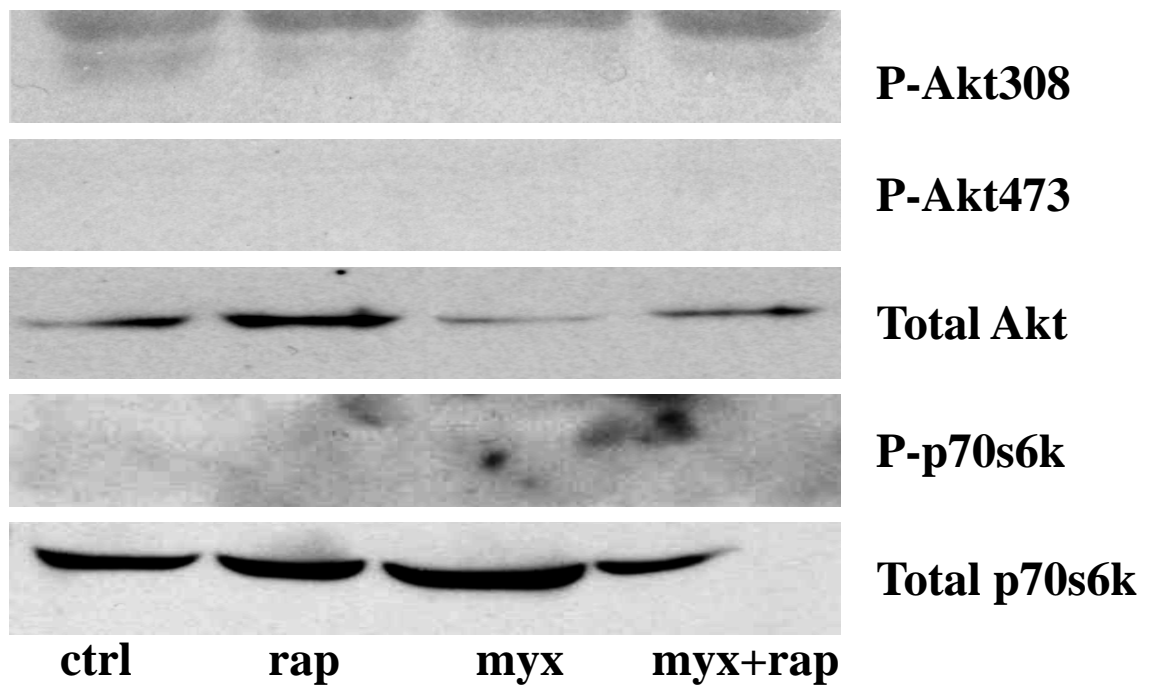

### B) NIH 3T3 cell line

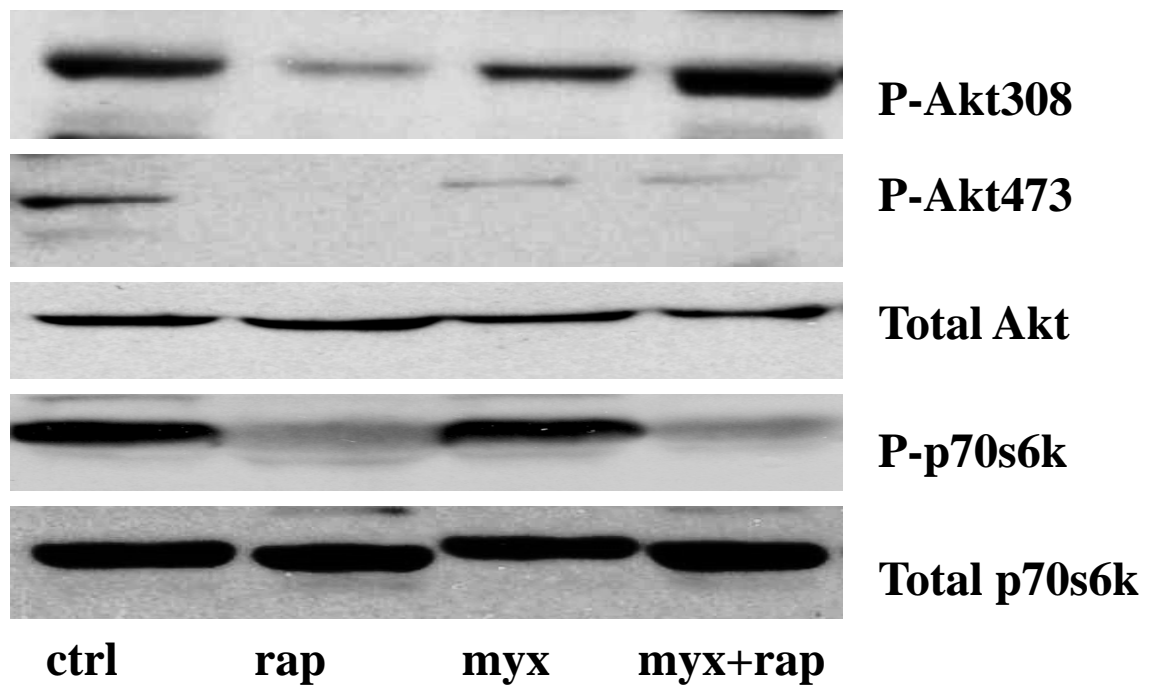

Supplement: NIHMS673031-supplement-Sup_Figure_1.pdf [file NIHMS673031-supplement-Sup_Figure_1.pdf]
